# Supplementary material
Source: ML conference proceedings conference paper supplement (https://openaccess.thecvf.com/content/CVPR2024/html/Chen_Overload_Latency_Attacks_CVPR_2024_paper.html)
Supplement: Supplementary file 1 [file Chen_Overload_Latency_Attacks_CVPR_2024_supplemental.pdf]

# Overload: Latency Attacks on Object Detection for Edge Devices

Erh-Chung Chen<sup>1\*</sup>

Pin-Yu Chen<sup>2</sup>

I-Hsin Chung<sup>2</sup>

Che-Rung Lee<sup>1</sup>

National Tsing Hua University<sup>1</sup>

s107062802@m107.nthu.edu.tw

cherung@cs.nthu.edu.tw

IBM Research<sup>2</sup>

pin-yu.chen@ibm.com

ihchung@us.ibm.com

## A. Comprehensive Analysis of NMS Algorithm

As described in earlier section, the steps of NMS can be divided into four major tasks:

1. Filtering low-confidence objects;
2. Sorting candidates by probabilities;
3. Calculating pairwise IoU scores;
4. Pruning inactive objects.

Let  $\mathcal{C}$  be the set of objects fed into NMS. In this first step, the filtering step scans all objects in the set and deletes low-confidence objects, resulting in linear time complexity  $O(|\mathcal{C}|)$ . In the second step, the time complexity of sorting is well known as  $O(|\mathcal{C}| \log(|\mathcal{C}|))$ . In the third step, NMS constructs a  $|\mathcal{C}| \times |\mathcal{C}|$  matrix which stores the pairwise comparison results. IoU score computes the area of overlap between a pair of selected objects requiring a constant number of float operations. Therefore, the time complexity is  $O(|\mathcal{C}| \times |\mathcal{C}|)$ . In the last step, the major goal is to prune unqualified objects based on the IoU scores. The details are listed in Algorithm 1, where  $\mathbf{S}_{|\mathcal{C}| \times |\mathcal{C}|}$  stores IoU scores. An object is marked duplicated if the IoU score  $\mathbf{S}[i][j]$  is greater than the NMS threshold  $N_t$ .  $\mathbf{r}$  is a utility array tracking whether the objects are marked. To obtain the worst case, we assume that no objects are duplicated, making the condition in line 5 always satisfied. As a result, the algorithm can be simplified to a two-layer loop that traverses half elements in the matrix  $\mathbf{S}$ . Therefore, the overall time complexity is independent of the rate of survival objects or the properties of boxes although some elements are marked removable during the pruning procedure.

## B. Ablation Study

### B.1. Impact of Different Objective Functions

In Section ??, we mentioned that any monotonic increasing function can be used as the loss function. In this experiment, we evaluated the performance of four qualified functions:  $\log(x)$ ,  $\tanh(x)$ ,  $x^2/2$ , and  $-\log(1-x)$ .  $\log(x)$ .

\*The primary research and contribution for this work were conducted during a visit to IBM Research.

---

### Algorithm 1 NMS Pruning

---

```
1:  $n \leftarrow |\mathcal{C}|$ 
2:  $\mathbf{r} = \mathbf{0}$ 
3:  $\mathcal{D} \leftarrow \{\}$ 
4: for  $i = 1$  to  $n$  do
5:   if  $\mathbf{r}[i] \neq \text{True}$  then
6:      $\mathcal{D} \leftarrow \mathcal{D} \cup \{i\}$ 
7:     for  $j = i + 1$  to  $n$  do
8:        $\mathbf{r}[j] = \text{bool}(\mathbf{r}[j] + \mathbf{S}[i][j] > N_t)$ 
9:     end for
10:  end if
11: end for
```

---

The derivative of  $\tanh(x)$  is 1 at  $x = 0$  and smoothly decreases as  $x$  increases.  $x^2/2$  is a convex function with its minimum point at  $x = 0$ , and its derivative gradually increases. The limit of  $-\log(1-x)$  as  $x$  approaches 1 from the left is positive infinity.

Table 1 shows that  $x^2/2$  and  $-\log(1-x)$  result in significantly fewer total objects compared to the other functions. To explain this phenomenon, we divide the objects predicted by the model into two sets:  $\mathcal{S}^+$  and  $\mathcal{S}^-$ , where  $\mathcal{S}^+ = \{x | \text{conf}(M(x)i) > T\text{IoU}\}$  and  $\mathcal{S}^- = \{x | \text{conf}(M(x)i) \leq T\text{IoU}\}$ . The original objective of the loss function is to maximize the confidence of individual boxes in set  $\mathcal{S}^-$ , increasing the total number of objects fed into NMS. However,  $-\log(1-x)$  tends to increase the confidence of boxes in set  $\mathcal{S}^-$  due to the rapid growth of its derivative when  $x$  is close to 1.0. As a result, although PGD maximizes the objective function defined in (??),  $-\log(1-x)$  yields the worst performance. The behavior of  $x^2/2$  is similar, as its derivative increases gradually. Therefore, an effective objective function should not only be a monotonic increasing function but also have a monotonically decreasing derivative.

| YOLOv5s    |               |       |       |                |       |       |             |       |      |                  |       |      |
|------------|---------------|-------|-------|----------------|-------|-------|-------------|-------|------|------------------|-------|------|
| Percentile | $F = \log(x)$ |       |       | $F = \tanh(x)$ |       |       | $F = x^2/2$ |       |      | $F = -\log(1-x)$ |       |      |
|            | objects       | boxes | time  | objects        | boxes | time  | objects     | boxes | time | objects          | boxes | time |
| min        | 3228          | 392   | 52.8  | 9269           | 1081  | 25.0  | 3035        | 228   | 17.8 | 4556             | 511   | 19.3 |
| 0.10       | 18900         | 1570  | 52.8  | 19546          | 1829  | 45.9  | 5708        | 357   | 19.6 | 9553             | 555   | 23.9 |
| 0.25       | 23494         | 2817  | 91.8  | 17140          | 1471  | 148.3 | 6644        | 427   | 20.4 | 10079            | 647   | 25.0 |
| 0.50       | 22273         | 2617  | 167.4 | 19677          | 1961  | 192.1 | 6934        | 413   | 21.4 | 10955            | 579   | 26.6 |
| 0.75       | 22660         | 1630  | 208.5 | 21559          | 1448  | 227.1 | 8681        | 502   | 23.0 | 11529            | 644   | 27.9 |
| 0.90       | 22951         | 3162  | 241.2 | 22231          | 2585  | 241.6 | 10617       | 548   | 26.0 | 12422            | 790   | 29.1 |
| max        | 23922         | 1386  | 241.2 | 22944          | 1382  | 253.0 | 13104       | 824   | 30.2 | 12632            | 813   | 39.7 |

  

| YOLOv5n    |               |       |       |                |       |       |             |       |      |                  |       |      |
|------------|---------------|-------|-------|----------------|-------|-------|-------------|-------|------|------------------|-------|------|
| Percentile | $F = \log(x)$ |       |       | $F = \tanh(x)$ |       |       | $F = x^2/2$ |       |      | $F = -\log(1-x)$ |       |      |
|            | objects       | boxes | time  | objects        | boxes | time  | objects     | boxes | time | objects          | boxes | time |
| min        | 2890          | 763   | 13.3  | 4134           | 579   | 14.3  | 3435        | 210   | 13.0 | 3060             | 294   | 12.9 |
| 0.10       | 9012          | 1145  | 19.5  | 11950          | 1103  | 23.9  | 5295        | 339   | 14.3 | 8009             | 573   | 17.2 |
| 0.25       | 12985         | 1474  | 26.0  | 14064          | 1194  | 27.6  | 6074        | 355   | 15.0 | 8751             | 600   | 18.2 |
| 0.50       | 16755         | 1737  | 34.3  | 16128          | 1319  | 32.0  | 6920        | 444   | 15.8 | 9631             | 697   | 19.5 |
| 0.75       | 18910         | 1766  | 69.7  | 18276          | 1206  | 37.2  | 8079        | 448   | 17.1 | 10909            | 656   | 21.2 |
| 0.90       | 20901         | 1649  | 135.5 | 17507          | 1460  | 117.9 | 9361        | 612   | 18.7 | 11746            | 684   | 22.6 |
| max        | 22303         | 1472  | 231.6 | 20902          | 1238  | 206.7 | 9946        | 585   | 25.3 | 15479            | 983   | 30.4 |

Table 1. The total elapsed time using different objective function on NVIDIA Jetson NX

## B.2. Spatial Attention Evaluation

This experiment evaluates the influence of spatial attention. Table 2 shows the experimental results on Nvidia Jetson NX, where *SA* means the adversarial attack with the spatial attention and *PGD* means the native implementation of PGD. As can be seen, one can find that the spatial attention method can generate approximately 2,000 or more objects for the YOLOv5s and YOLOv5n models. This increase in object count is due to the iterative generation of objects from regions with fewer objects, facilitated by the proposed spatial attention technique.

Table 3 offers a performance comparison with different grid sizes, where *Grid* signifies that the image is tiled into  $k \times k$  grids. In the case of  $1 \times 1$  tiling, the configuration reverts to the original PGD attack, where all pixels are part of the same grid, sharing identical weights. Upon introducing spatial attention, specific areas can be highlighted, resulting in a performance gain. However, when the image is divided into a  $20 \times 20$  grid, some tiles remain unhighlighted, hindering effective attacks on those tiles. The experimental findings suggest that an optimal configuration for spatial attention is around  $5 \times 5$ .

These results demonstrate the effectiveness of the spatial attention technique in generating a larger number of objects. The comparison between SA and PGD sheds light on the potential vulnerabilities and limitations of the YOLOv5 models when exposed to adversarial attacks with spatial at-

tention.

## C. Latency Attacks on Various Models

This experiment aims to comprehensively evaluate the performance of the proposed latency attack on various models. To extend our analysis, we conducted additional experiments on YOLOv3 model and two latest YOLO models, namely YOLOv7 and YOLOv8. Tables 4 presents the results obtained from these models, where the elapsed time was not measured as these models are not fully optimized for edge devices.

The obtained results reveal the effectiveness of our attack. At the 50th percentile, our attack generates 20,578 objects for YOLOv7 and 23,163 objects for YOLOv7-tiny. Similarly, for YOLOv8, our attack generates 8,313 objects at the 50th percentile. These numbers are in comparison to the maximum number of objects predicted by YOLOv7 (25,200 objects) and YOLOv8 (8,400 objects). The significant number of objects generated by our attack demonstrates its potency. Consequently, our findings indicate that both YOLOv7 and YOLOv8 models are susceptible to latency attacks. It is worth mentioning that as the total number of objects increases, the elapsed time during the attack is expected to rise.

We argue that object detection models with different architectures are also vulnerable to latency attacks. However, it is important to note that the proposed objective in (??)



| Percentile | YOLOv7               |       |                   |       | YOLOv7-tiny          |       |                   |       |
|------------|----------------------|-------|-------------------|-------|----------------------|-------|-------------------|-------|
|            | Adversarial Examples |       | Original Examples |       | Adversarial Examples |       | Original Examples |       |
|            | objects              | boxes | objects           | boxes | objects              | boxes | objects           | boxes |
| min        | 18310                | 3139  | 0                 | 0     | 18884                | 2398  | 0                 | 0     |
| 0.10       | 19897                | 3765  | 6                 | 1     | 23018                | 3259  | 97                | 9     |
| 0.25       | 20119                | 4069  | 18                | 2     | 23068                | 3390  | 32                | 3     |
| 0.50       | 20578                | 3681  | 30                | 3     | 23163                | 3313  | 12                | 1     |
| 0.75       | 21310                | 4991  | 10                | 2     | 23083                | 3519  | 28                | 3     |
| 0.90       | 20359                | 3912  | 27                | 3     | 23007                | 3708  | 74                | 9     |
| max        | 22072                | 4243  | 12                | 1     | 22971                | 3399  | 36                | 2     |

  

| Percentile | YOLOv8s              |       |                   |       | YOLOv8n              |       |                   |       |
|------------|----------------------|-------|-------------------|-------|----------------------|-------|-------------------|-------|
|            | Adversarial Examples |       | Original Examples |       | Adversarial Examples |       | Original Examples |       |
|            | objects              | boxes | objects           | boxes | objects              | boxes | objects           | boxes |
| min        | 8244                 | 1188  | 0                 | 0     | 7881                 | 1652  | 0                 | 0     |
| 0.10       | 8273                 | 1273  | 46                | 6     | 8044                 | 1747  | 56                | 9     |
| 0.25       | 8250                 | 1098  | 28                | 4     | 7839                 | 1530  | 10                | 1     |
| 0.50       | 8313                 | 1212  | 76                | 14    | 7759                 | 1884  | 7                 | 1     |
| 0.75       | 8333                 | 1326  | 133               | 21    | 7886                 | 1918  | 1                 | 1     |
| 0.90       | 8333                 | 1141  | 51                | 5     | 8017                 | 1658  | 121               | 23    |
| max        | 8347                 | 1268  | 37                | 5     | 7968                 | 1836  | 85                | 16    |

  

| Percentile | YOLOv3               |       |                   |       | YOLOv3-tiny          |       |                   |       |
|------------|----------------------|-------|-------------------|-------|----------------------|-------|-------------------|-------|
|            | Adversarial Examples |       | Original Examples |       | Adversarial Examples |       | Original Examples |       |
|            | objects              | boxes | objects           | boxes | objects              | boxes | objects           | boxes |
| min        | 11879                | 2107  | 0                 | 0     | 5760                 | 1554  | 0                 | 0     |
| 0.10       | 13198                | 2558  | 76                | 7     | 5873                 | 1674  | 0                 | 0     |
| 0.25       | 13401                | 2565  | 62                | 6     | 5884                 | 1619  | 56                | 6     |
| 0.50       | 14015                | 2562  | 134               | 9     | 5940                 | 2061  | 30                | 3     |
| 0.75       | 14109                | 2707  | 205               | 17    | 5867                 | 2380  | 125               | 24    |
| 0.90       | 14365                | 2839  | 84                | 7     | 5981                 | 2528  | 16                | 4     |
| max        | 14172                | 2651  | 39                | 3     | 5870                 | 1543  | 21                | 2     |

Table 4. Latency Attacks on YOLOv7, YOLOv8, and YOLOv3 models

| Percentile | YOLOv5s              |       |       |                   |       |      | YOLOv3               |       |                   |       |
|------------|----------------------|-------|-------|-------------------|-------|------|----------------------|-------|-------------------|-------|
|            | Adversarial Examples |       |       | Original Examples |       |      | Adversarial Examples |       | Original Examples |       |
|            | objects              | boxes | time  | objects           | boxes | time | objects              | boxes | objects           | boxes |
| min        | 10778                | 1541  | 11.1  | 0                 | 0     | 14.1 | 8443                 | 1107  | 0                 | 0     |
| 0.10       | 15771                | 1897  | 43.8  | 40                | 3     | 16.4 | 13138                | 1518  | 27                | 4     |
| 0.25       | 18167                | 2124  | 96.2  | 47                | 4     | 16.4 | 14091                | 1563  | 220               | 18    |
| 0.50       | 22755                | 2392  | 132.7 | 28                | 3     | 16.4 | 14796                | 1629  | 49                | 5     |
| 0.75       | 20338                | 1844  | 170.4 | 3                 | 1     | 16.6 | 15418                | 1661  | 44                | 3     |
| 0.90       | 22384                | 2795  | 248.3 | 234               | 21    | 16.7 | 16027                | 1656  | 63                | 3     |
| max        | 23579                | 1580  | 252.9 | 212               | 21    | 16.9 | 17684                | 1785  | 12                | 1     |

Table 5. Results of the ensemble attack

different victim model, is a common phenomenon in image classification tasks. However, when testing the transferability among different models in the YOLOv5 family

for the latency attack, we did not observe this property. One possible reason is that the object detection network utilizes the Feature Pyramid Network (FPN), which com-



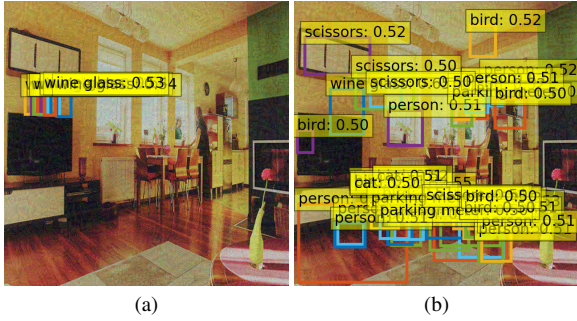

Figure 2. The outputs of the adversarial examples by FCOS. 2a and 2b are generated by the normal PGD attack and Overload attack, respectively.

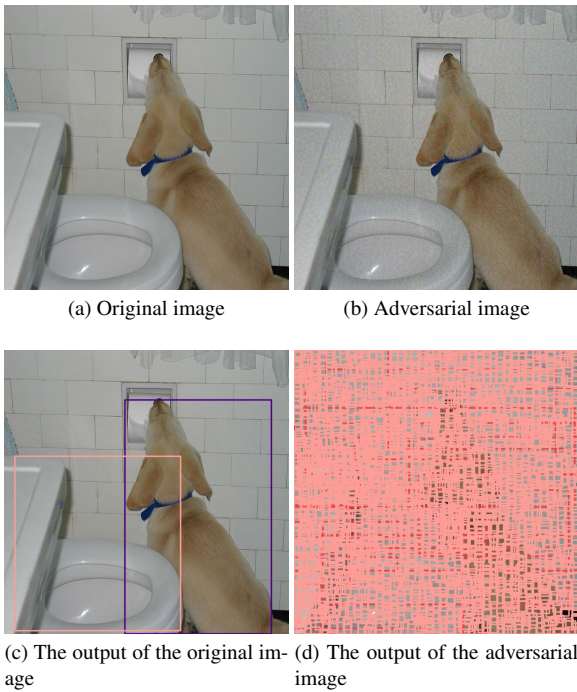

Figure 3. An example of Overload attack for object detection.

combines features extracted from both low-resolution and high-resolution sources. This integration of features from different networks may lead to divergence and hinder the transferability of the attack.

Nevertheless, we explored an alternative approach known as ensemble training to craft adversarial examples that can deceive multiple models. In the ensemble attack, gradients are obtained from either one candidate model or averaged across all candidate models in each attack step. We evaluated the performance of the ensemble attack using a combination of YOLOv3 and YOLOv5s models. Table 5 presents the results of the ensemble attack, omitting the execution times for YOLOv3 due to a technical issue with compiling the model to TensorRT format.

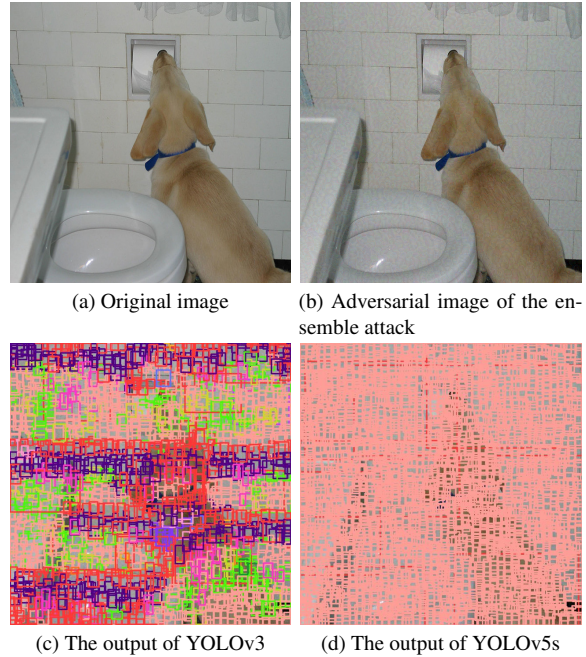

Figure 4. An example of ensemble attack for object detection.

As observed, the ensemble attack successfully generates a significant number of objects for both YOLOv3 and YOLOv5s simultaneously. However, comparing these results with those in Table ??, it appears that the strength of the ensemble attack is slightly weaker than that of the native attack. To provide visual context, Figure 3 and Figure 4 illustrate the original image, the corresponding adversarial image, and the results obtained from Overload and the ensemble attack, respectively.

These findings suggest that information from multiple models can be encoded within a single image, enabling the ensemble attack to deceive different object detection models. However, further investigation is needed to enhance the effectiveness and transferability of the ensemble attack against the latency-based defense.
